# Supplementary material for: Mortality Risk Among Patients With COVID-19 Prescribed Selective Serotonin Reuptake Inhibitor Antidepressants
Source: PubMed Central journal article supplement (PMC8593759; doi:10.1001/jamanetworkopen.2021.33090), 2021-11-15
Supplement: jamanetwopen-e2133090-s001.pdf [file jamanetwopen-e2133090-s001.pdf]

## Supplementary Online Content

Oskotsky T, Marić I, Tang A, et al. Mortality risk among patients with COVID-19 prescribed selective serotonin reuptake inhibitor antidepressants. *JAMA Netw Open*. 2021;4(11):e2133090.  
doi:10.1001/jamanetworkopen.2021.33090

**eFigure 1.** Propensity Scores (PS) and Standardized Mean Differences (SMD) of Covariates for Comparison of SSRI-Treated Patients and Matched Control Patients

**eFigure 2.** Propensity Scores (PS) and Standardized Mean Differences (SMD) of Covariates for Comparison of Fluoxetine-Treated Patients and Matched Control Patients

**eFigure 3.** Propensity Scores (PS) and Standardized Mean Differences (SMD) of Covariates for Comparison of Fluoxetine- or Fluvoxamine-Treated Patients and Matched Control Patients

**eFigure 4.** Propensity Scores (PS) and Standardized Mean Differences (SMD) of Covariates for Comparison of Other (Not Fluoxetine or Fluvoxamine) SSRI-Treated Patients and Matched Control Patients

**eTable 1.** Standardized Mean Differences (SMD) of Covariates Between SSRI-Treated and Control Groups Before and After Matching

**eTable 2.** Standardized Mean Differences (SMD) of Covariates Between Fluoxetine-Treated and Control Groups Before and After Matching

**eTable 3.** Standardized Mean Differences (SMD) of Covariates Between Fluoxetine- or Fluvoxamine-Treated and Control Groups Before and After Matching

**eTable 4.** Standardized Mean Differences (SMD) of Covariates Between Other (Not Fluoxetine or Fluvoxamine) SSRI-Treated and Control Groups Before and After Matching

**eTable 5.** Propensity Score (PS) Matching by Demographics, Encounter Type at the Time of the First Recorded COVID-19 Diagnosis, COVID-19 Comorbidities, and Prescription Indications for SSRI-Exposed Patients and Unexposed Control Patients

**eTable 6.** Propensity Score (PS) Matching by Demographics, Encounter Type at the Time of the First Recorded COVID-19 Diagnosis, COVID-19 Comorbidities, and Prescription Indications for Fluoxetine-Exposed Patients and Unexposed Control Patients

**eTable 7.** Propensity Score (PS) Matching by Demographics, Encounter Type at the Time of the First Recorded COVID-19 Diagnosis, COVID-19 Comorbidities, and Prescription Indications for Fluoxetine- or Fluvoxamine-Exposed Patients and Unexposed Control Patients

**eTable 8.** Propensity Score (PS) Matching by Demographics, Encounter Type at the Time of the First Recorded COVID-19 Diagnosis, COVID-19 Comorbidities, and Prescription Indications for Other (Not Fluoxetine or Fluvoxamine) SSRI-Exposed Patients and Unexposed Control Patients

This supplementary material has been provided by the authors to give readers additional information about their work.

**eFigure 1. Propensity Scores (PS) and Standardized Mean Differences (SMD) of Covariates for Comparison of SSRI-Treated Patients and Matched Control Patients**

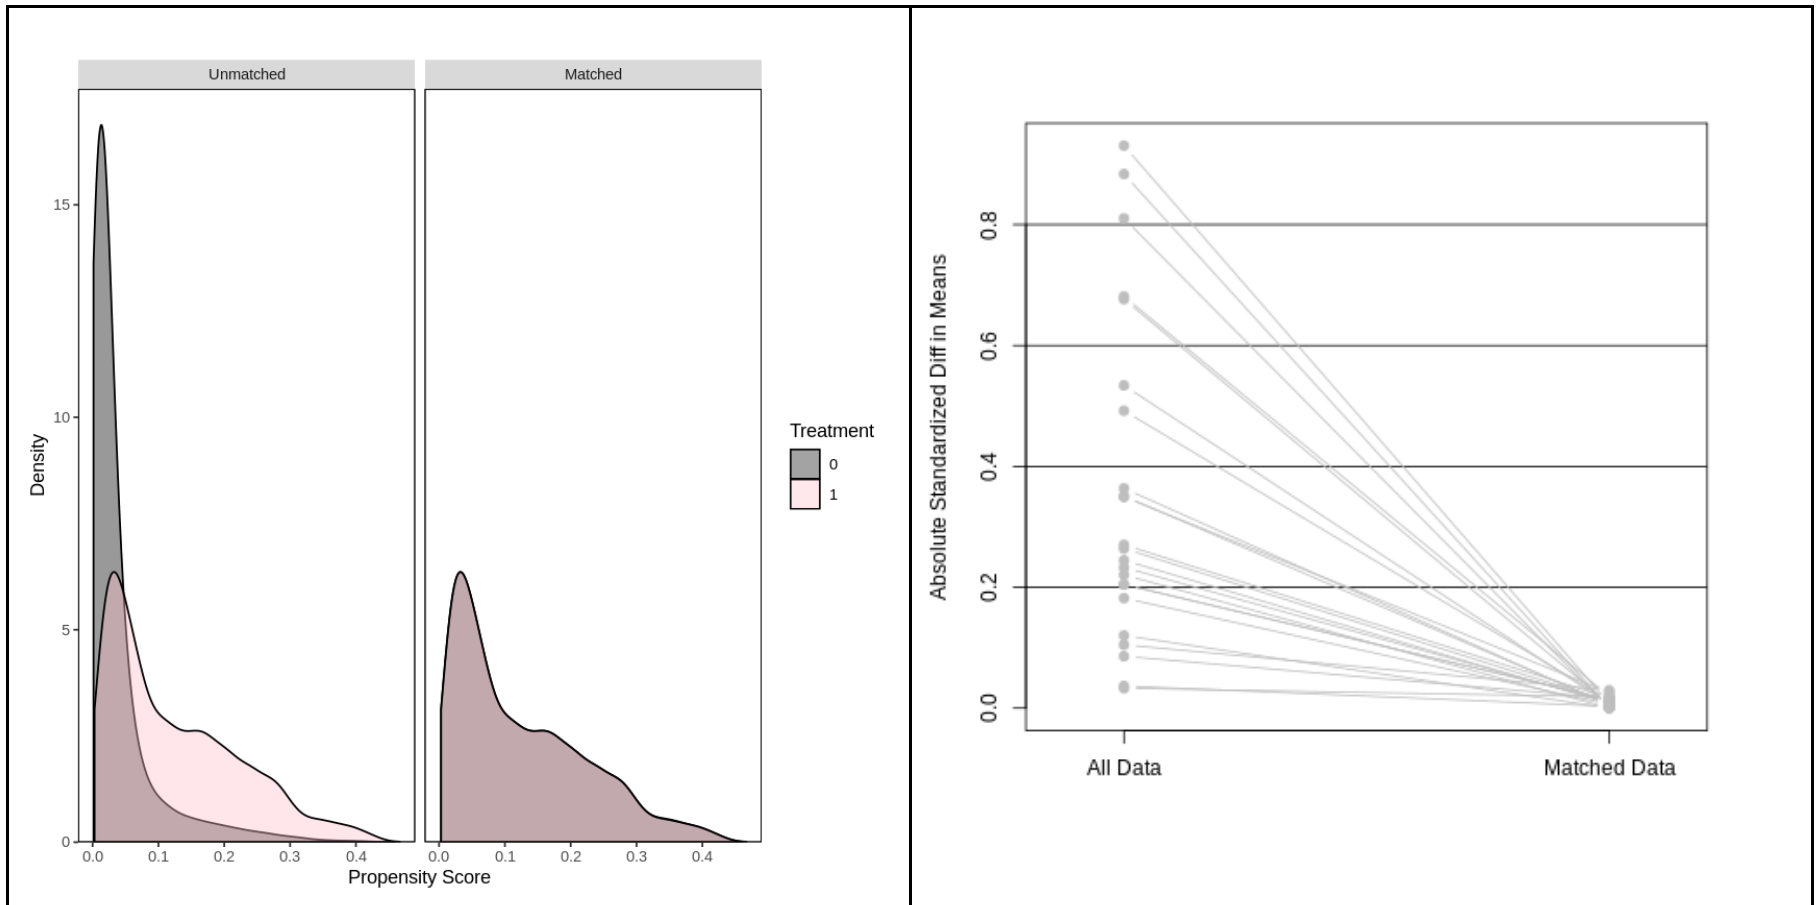

**(a)** Density plots of the distribution of propensity scores for the SSRI-treated and control groups before and after matching. **(b)** Absolute standardized differences in means between SSRI-treated and control groups for all data (before matching) and matched data.

**eFigure 2. Propensity Scores (PS) and Standardized Mean Differences (SMD) of Covariates for Comparison of Fluoxetine-Treated Patients and Matched Control Patients**

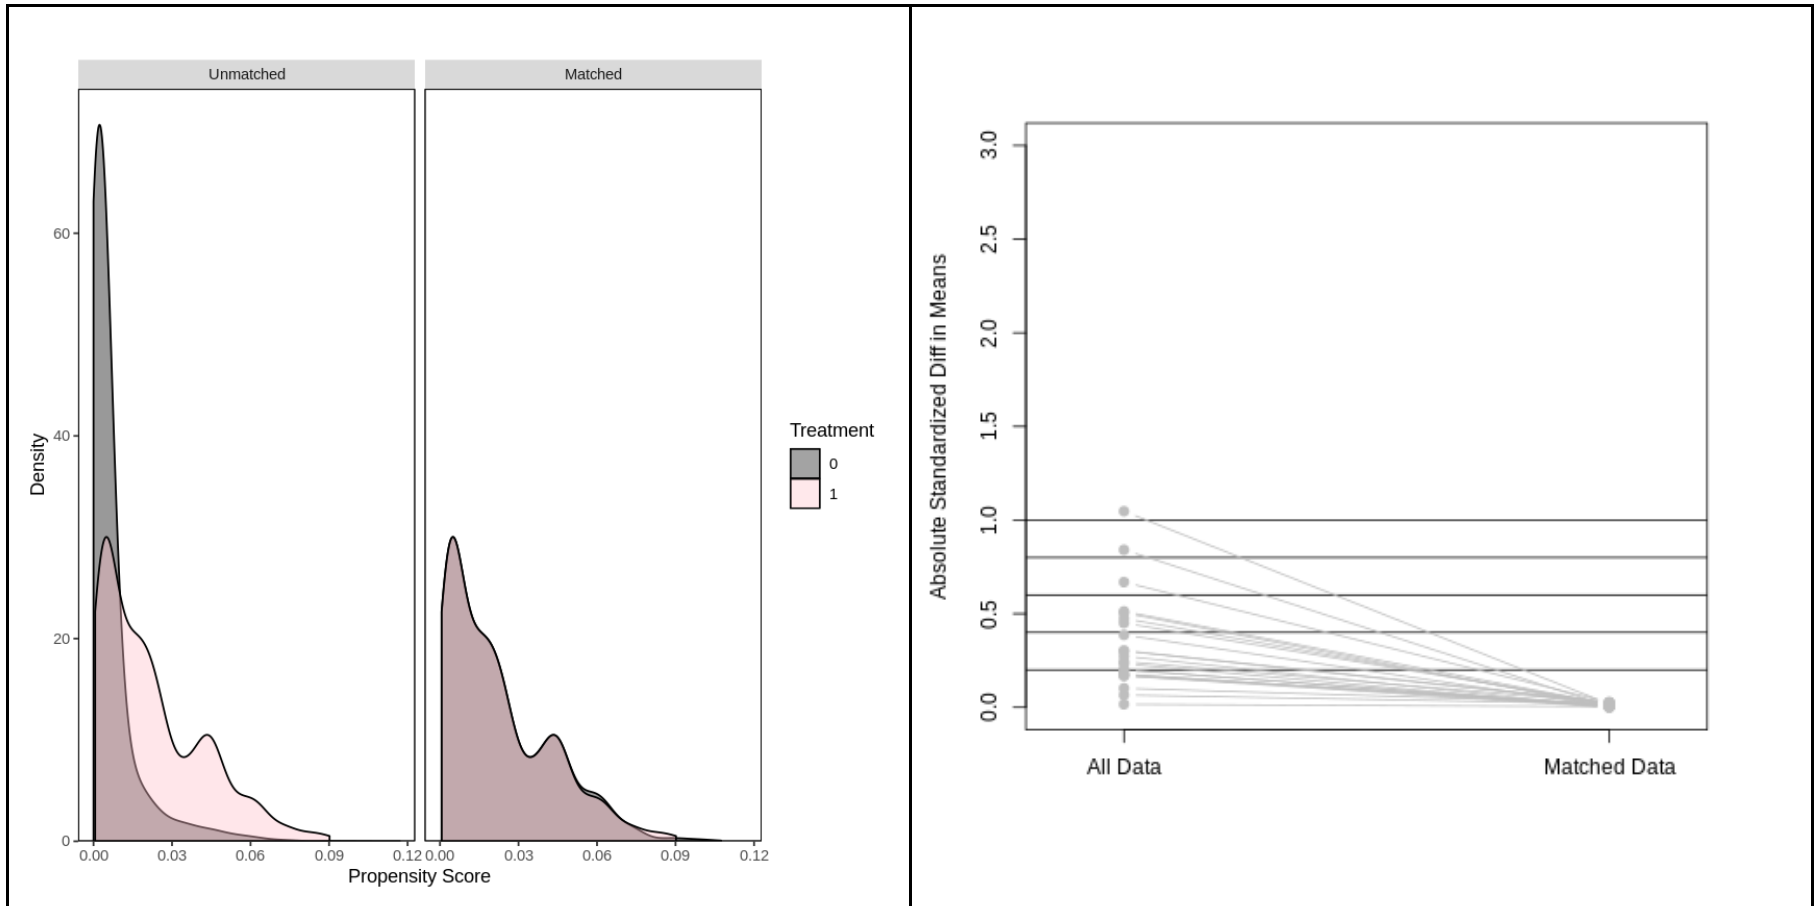

**(a)** Density plots of the distribution of propensity scores for the fluoxetine-treated and control groups before and after matching. **(b)** Absolute standardized differences in means between fluoxetine-treated and control groups for all data (before matching) and matched data.

**eFigure 3. Propensity Scores (PS) and Standardized Mean Differences (SMD) of Covariates for Comparison of Fluoxetine- or Fluvoxamine-Treated Patients and Matched Control Patients**

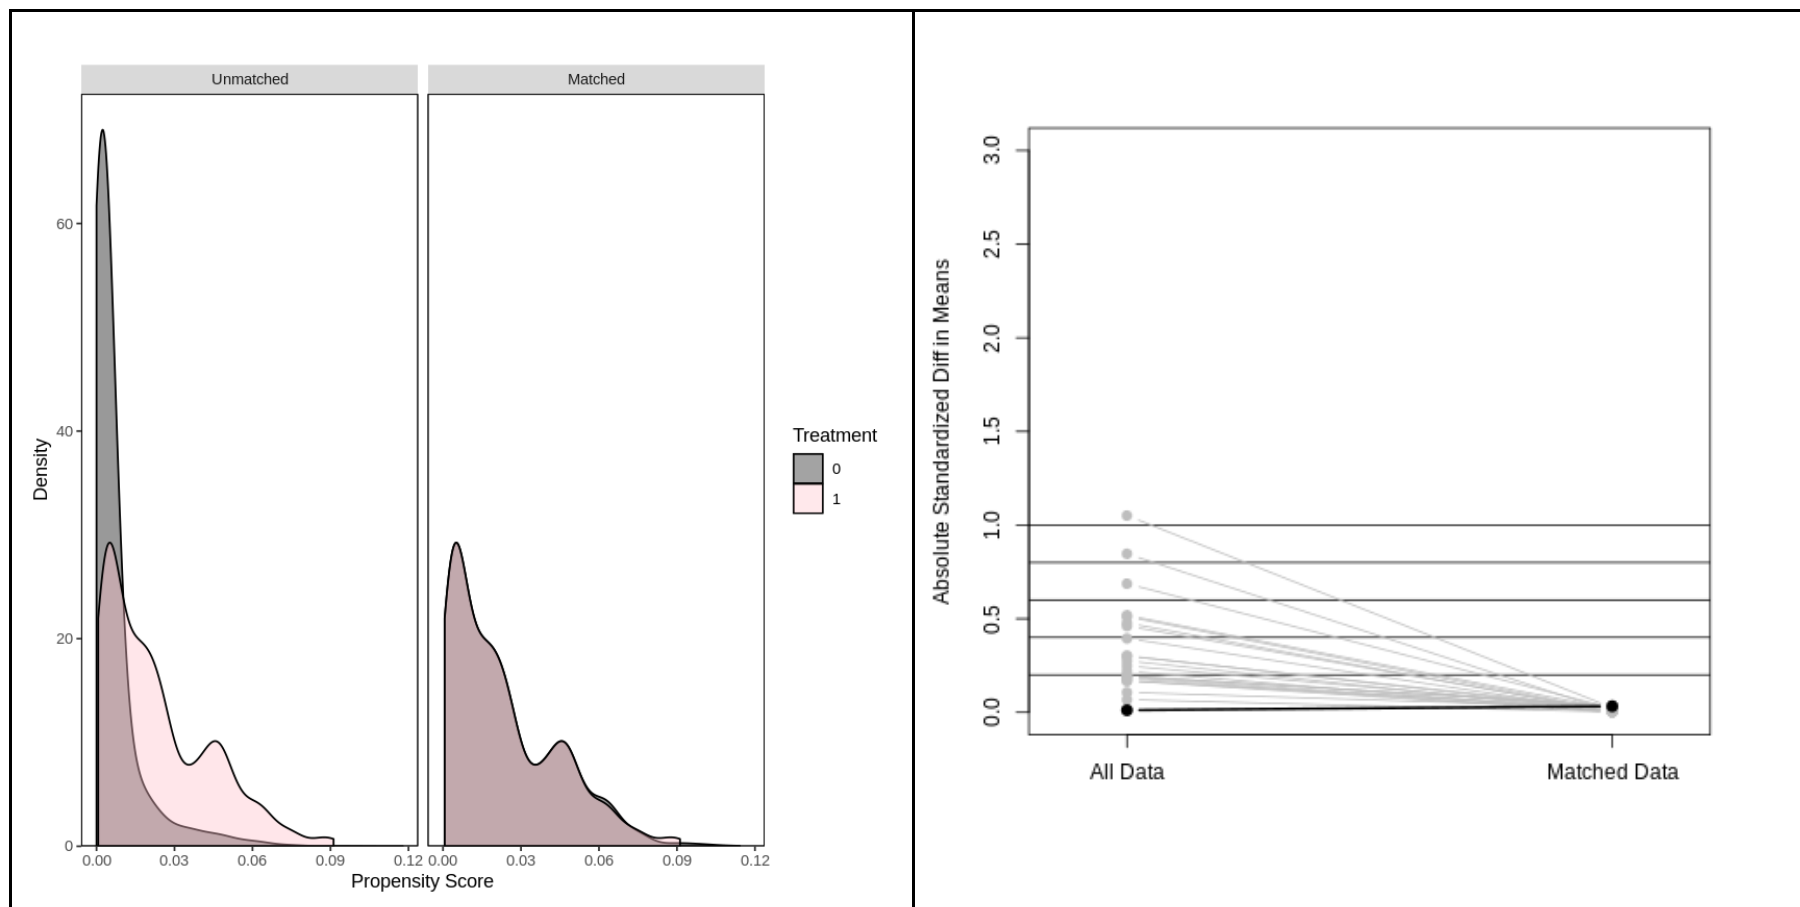

**(a)** Density plots of the distribution of propensity scores for the fluoxetine- or fluvoxamine-treated and control groups before and after matching. **(b)** Absolute standardized differences in means between fluoxetine- or fluvoxamine-treated and control groups for all data (before matching) and matched data.

**eFigure 4. Propensity Scores (PS) and Standardized Mean Differences (SMD) of Covariates for Comparison of Other (Not Fluoxetine or Fluvoxamine) SSRI-Treated Patients and Matched Control Patients**

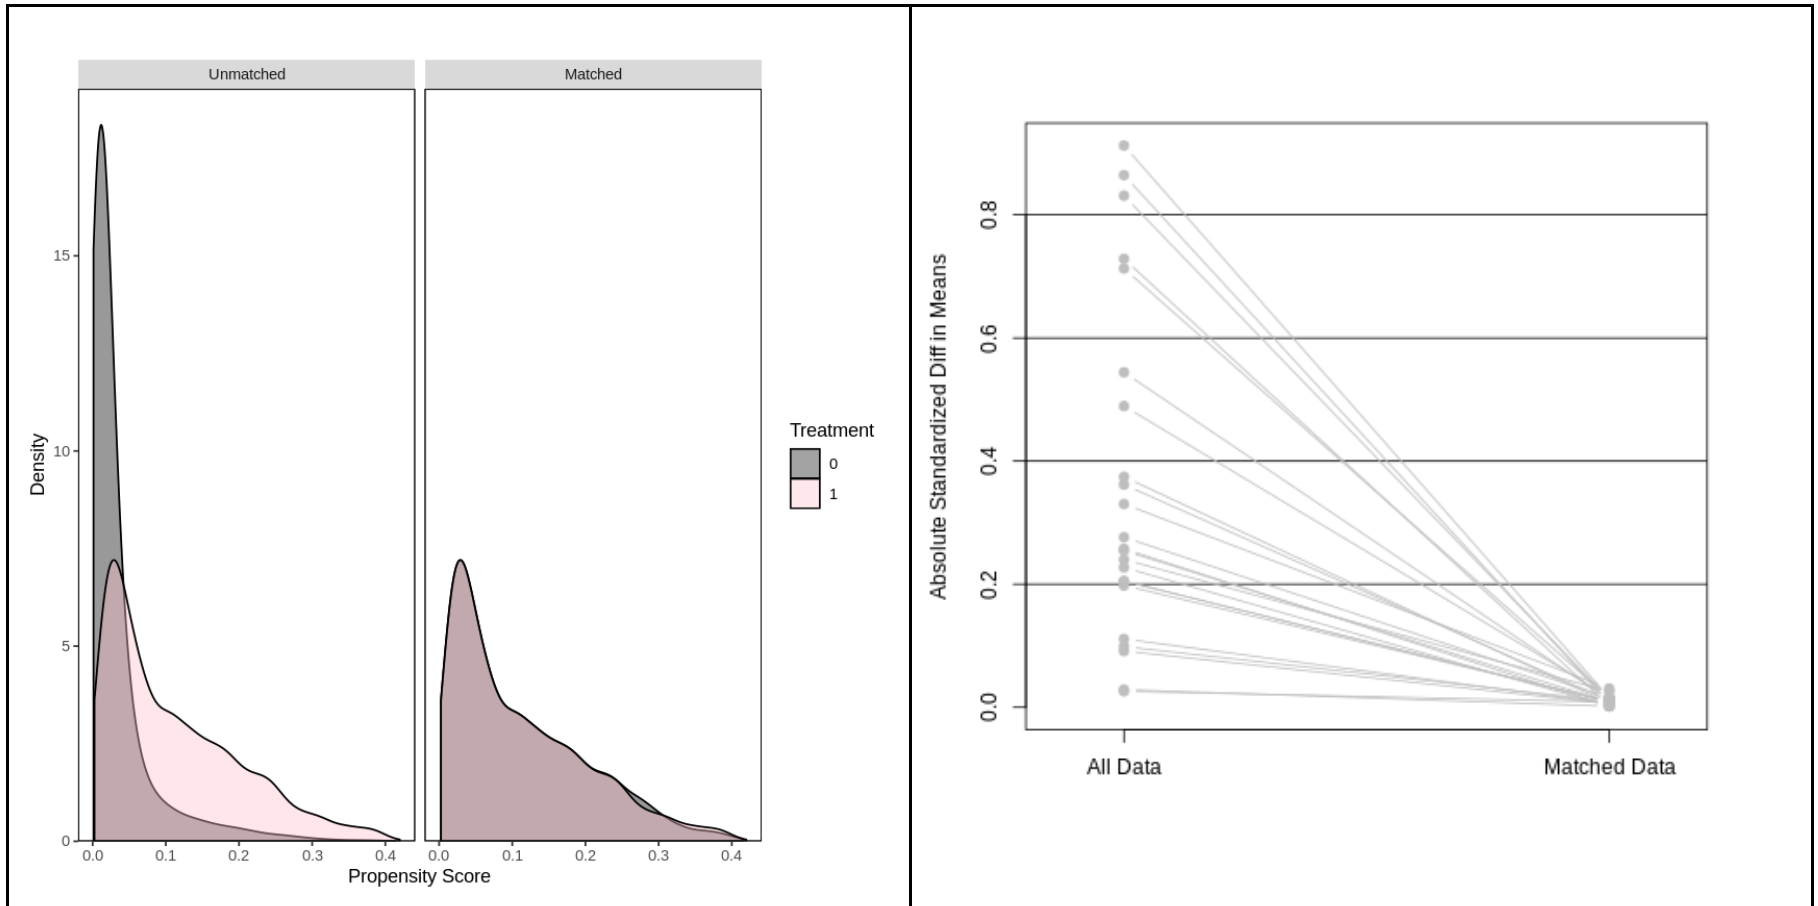

**(a)** Density plots of the distribution of propensity scores for the other SSRI-treated and control groups before and after matching. **(b)** Absolute standardized differences in means between other SSRI-treated and control groups for all data (before matching) and matched data.

**eTable 1.** Standardized Mean Differences (SMD) of Covariates Between SSRI-Treated and Control Groups Before and After Matching

|                                                  | Before Matching       |                       |       | After Matching        |                       |        |
|--------------------------------------------------|-----------------------|-----------------------|-------|-----------------------|-----------------------|--------|
|                                                  | Means (SD)<br>Treated | Means (SD)<br>Control | SMD   | Means (SD)<br>Treated | Means (SD)<br>Control | SMD    |
| Age                                              | 63.83 (18.07)         | 51.61 (19.18)         | 0.66  | 63.83 (18.07)         | 63.71 (17.87)         | 0.01   |
| Female                                           | 0.60 (0.49)           | 0.50 (0.50)           | 0.20  | 0.60 (0.49)           | 0.60 (0.49)           | 0.01   |
| Male                                             | 0.40 (0.49)           | 0.50 (0.50)           | -0.20 | 0.40 (0.49)           | 0.40 (0.49)           | 0.01   |
| American Indian or Alaska Native                 | 0.01 (0.11)           | 0.02 (0.14)           | -0.07 | 0.01 (0.11)           | 0.01 (0.11)           | 0.00   |
| Asian or Pacific Islander                        | 0.01 (0.11)           | 0.02 (0.16)           | -0.10 | 0.01 (0.11)           | 0.01 (0.11)           | <0.001 |
| Black or African American                        | 0.14 (0.35)           | 0.20 (0.40)           | -0.17 | 0.14 (0.35)           | 0.14 (0.35)           | 0.01   |
| Mixed Racial Group                               | 0.00 (0.05)           | 0.00 (0.06)           | 0.03  | 0.00 (0.05)           | 0.00 (0.05)           | 0.00   |
| Other Racial Group                               | 0.07 (0.25)           | 0.14 (0.34)           | -0.23 | 0.07 (0.25)           | 0.06 (0.24)           | 0.02   |
| White                                            | 0.77 (0.42)           | 0.61 (0.49)           | 0.34  | 0.77 (0.42)           | 0.77 (0.42)           | 0.01   |
| Hispanic or Latino                               | 0.29 (0.45)           | 0.44 (0.50)           | -0.33 | 0.29 (0.45)           | 0.27 (0.45)           | 0.03   |
| Not Hispanic or Latino                           | 0.71 (0.45)           | 0.56 (0.50)           | 0.33  | 0.71 (0.45)           | 0.73 (0.45)           | -0.03  |
| Admitted for Observation                         | 0.06 (0.25)           | 0.04 (0.19)           | 0.12  | 0.06 (0.25)           | 0.06 (0.23)           | 0.03   |
| Emergency                                        | 0.19 (0.39)           | 0.51 (0.50)           | -0.71 | 0.19 (0.39)           | 0.19 (0.39)           | <0.001 |
| Inpatient                                        | 0.74 (0.44)           | 0.44 (0.50)           | 0.64  | 0.74 (0.44)           | 0.75 (0.43)           | -0.02  |
| Urgent care encounter                            | 0.01 (0.07)           | 0.01 (0.11)           | 0.08  | 0.01 (0.07)           | 0.00 (0.06)           | 0.03   |
| Obese                                            | 0.39 (0.49)           | 0.37 (0.48)           | 0.03  | 0.39 (0.49)           | 0.40 (0.49)           | -0.02  |
| Cancer                                           | 0.07 (0.26)           | 0.05 (0.22)           | 0.09  | 0.07 (0.26)           | 0.07 (0.26)           | 0.02   |
| Cerebrovascular Disease                          | 0.16 (0.36)           | 0.07 (0.26)           | 0.27  | 0.16 (0.36)           | 0.15 (0.36)           | 0.01   |
| Chronic Kidney Disease (CKD)                     | 0.21 (0.41)           | 0.12 (0.33)           | 0.24  | 0.21 (0.41)           | 0.21 (0.41)           | <0.001 |
| Chronic Obstructive Pulmonary Disease (COPD)     | 0.18 (0.38)           | 0.08 (0.26)           | 0.31  | 0.18 (0.38)           | 0.17 (0.38)           | 0.01   |
| Diabetes                                         | 0.43 (0.49)           | 0.30 (0.46)           | 0.25  | 0.43 (0.49)           | 0.43 (0.50)           | 0.01   |
| Heart Diseases                                   | 0.36 (0.48)           | 0.19 (0.40)           | 0.38  | 0.36 (0.48)           | 0.37 (0.48)           | -0.01  |
| Hypertension                                     | 0.71 (0.46)           | 0.46 (0.50)           | 0.51  | 0.71 (0.46)           | 0.71 (0.45)           | 0.01   |
| Mood or Anxiety Disorder                         | 0.63 (0.48)           | 0.18 (0.39)           | 1.03  | 0.63 (0.48)           | 0.63 (0.48)           | 0.01   |
| Other Psychiatric Disorder (Not Mood or Anxiety) | 0.49 (0.50)           | 0.24 (0.43)           | 0.53  | 0.49 (0.50)           | 0.48 (0.50)           | 0.01   |

**eTable 2.** Standardized Mean Differences (SMD) of Covariates Between Fluoxetine-Treated and Control Groups Before and After Matching

|                                              | Before Matching       |                       |       | After Matching        |                       |        |
|----------------------------------------------|-----------------------|-----------------------|-------|-----------------------|-----------------------|--------|
|                                              | Means (SD)<br>Treated | Means (SD)<br>Control | SMD   | Means (SD)<br>Treated | Means (SD)<br>Control | SMD    |
| Age                                          | 58.59 (18.09)         | 51.61 (19.18)         | 0.38  | 58.59 (18.09)         | 58.50 (18.86)         | 0.01   |
| Female                                       | 0.60 (0.49)           | 0.50 (0.50)           | 0.20  | 0.60 (0.49)           | 0.60 (0.49)           | 0.01   |
| Male                                         | 0.40 (0.49)           | 0.50 (0.50)           | -0.20 | 0.40 (0.49)           | 0.40 (0.49)           | 0.01   |
| American Indian or Alaska Native             | 0.01 (0.09)           | 0.02 (0.14)           | -0.10 | 0.01 (0.09)           | 0.01 (0.10)           | 0.01   |
| Asian or Pacific Islander                    | 0.01 (0.09)           | 0.02 (0.16)           | -0.13 | 0.01 (0.09)           | 0.01 (0.10)           | 0.01   |
| Black or African American                    | 0.17 (0.37)           | 0.20 (0.40)           | -0.10 | 0.17 (0.37)           | 0.17 (0.38)           | 0.02   |
| Mixed Racial Group                           | 0.00 (0.00)           | 0.00 (0.06)           | 0.09  | 0.00 (0.00)           | 0.00 (0.00)           | <0.001 |
| Other Racial Group                           | 0.07 (0.26)           | 0.14 (0.34)           | -0.20 | 0.07 (0.26)           | 0.07 (0.26)           | <0.001 |
| White                                        | 0.74 (0.44)           | 0.61 (0.49)           | 0.28  | 0.74 (0.44)           | 0.73 (0.44)           | 0.02   |
| Hispanic or Latino                           | 0.25 (0.43)           | 0.44 (0.50)           | -0.42 | 0.25 (0.43)           | 0.24 (0.43)           | 0.02   |
| Not Hispanic or Latino                       | 0.75 (0.43)           | 0.56 (0.50)           | 0.42  | 0.75 (0.43)           | 0.76 (0.43)           | -0.02  |
| Admitted for Observation                     | 0.09 (0.29)           | 0.04 (0.19)           | 0.23  | 0.09 (0.29)           | 0.08 (0.28)           | 0.03   |
| Emergency                                    | 0.23 (0.42)           | 0.51 (0.50)           | -0.61 | 0.23 (0.42)           | 0.24 (0.43)           | -0.03  |
| Inpatient                                    | 0.68 (0.47)           | 0.44 (0.50)           | 0.49  | 0.68 (0.47)           | 0.68 (0.47)           | 0.00   |
| Urgent care encounter                        | 0.00 (0.05)           | 0.01 (0.11)           | -0.13 | 0.00 (0.05)           | 0.00 (0.03)           | 0.03   |
| Obese                                        | 0.41 (0.49)           | 0.37 (0.48)           | 0.07  | 0.41 (0.49)           | 0.42 (0.49)           | -0.02  |
| Cancer                                       | 0.05 (0.22)           | 0.05 (0.22)           | 0.02  | 0.05 (0.22)           | 0.05 (0.22)           | 0.00   |
| Cerebrovascular Disease                      | 0.13 (0.34)           | 0.07 (0.26)           | 0.20  | 0.13 (0.34)           | 0.13 (0.34)           | 0.01   |
| Chronic Kidney Disease (CKD)                 | 0.19 (0.39)           | 0.12 (0.33)           | 0.18  | 0.19 (0.39)           | 0.19 (0.39)           | <0.001 |
| Chronic Obstructive Pulmonary Disease (COPD) | 0.20 (0.40)           | 0.08 (0.26)           | 0.36  | 0.20 (0.40)           | 0.18 (0.39)           | 0.03   |
| Diabetes                                     | 0.39 (0.49)           | 0.30 (0.46)           | 0.17  | 0.39 (0.49)           | 0.39 (0.49)           | 0.02   |
| Heart Diseases                               | 0.32 (0.47)           | 0.19 (0.40)           | 0.30  | 0.32 (0.47)           | 0.32 (0.47)           | <0.001 |
| Hypertension                                 | 0.69 (0.46)           | 0.46 (0.50)           | 0.46  | 0.69 (0.46)           | 0.69 (0.46)           | 0.01   |
| Mood or Anxiety Disorder                     | 0.67 (0.47)           | 0.18 (0.39)           | 1.14  | 0.67 (0.47)           | 0.68 (0.47)           | -0.02  |

|                                                  |             |             |      |             |             |      |
|--------------------------------------------------|-------------|-------------|------|-------------|-------------|------|
| Other Psychiatric Disorder (Not Mood or Anxiety) | 0.50 (0.50) | 0.24 (0.43) | 0.55 | 0.50 (0.50) | 0.49 (0.50) | 0.02 |
|--------------------------------------------------|-------------|-------------|------|-------------|-------------|------|



**eTable 3.** Standardized Mean Differences (SMD) of Covariates Between Fluoxetine- or Fluvoxamine-Treated and Control Groups Before and After Matching

|                                              | Before Matching       |                       |       | After Matching        |                       |        |
|----------------------------------------------|-----------------------|-----------------------|-------|-----------------------|-----------------------|--------|
|                                              | Means (SD)<br>Treated | Means (SD)<br>Control | SMD   | Means (SD)<br>Treated | Means (SD)<br>Control | SMD    |
| Age                                          | 58.69 (17.96)         | 51.61 (19.18)         | 0.38  | 58.69 (17.96)         | 58.63 (19.02)         | 0.00   |
| Female                                       | 0.59 (0.49)           | 0.50 (0.50)           | 0.19  | 0.59 (0.49)           | 0.61 (0.49)           | -0.04  |
| Male                                         | 0.41 (0.49)           | 0.50 (0.50)           | -0.19 | 0.41 (0.49)           | 0.39 (0.49)           | 0.04   |
| American Indian or Alaska Native             | 0.01 (0.09)           | 0.02 (0.14)           | -0.11 | 0.01 (0.09)           | 0.01 (0.09)           | 0.00   |
| Asian or Pacific Islander                    | 0.01 (0.09)           | 0.02 (0.16)           | -0.13 | 0.01 (0.09)           | 0.01 (0.09)           | 0.00   |
| Black or African American                    | 0.16 (0.37)           | 0.20 (0.40)           | -0.10 | 0.16 (0.37)           | 0.17 (0.38)           | -0.03  |
| Mixed Racial Group                           | 0.00 (0.00)           | 0.00 (0.06)           | 0.09  | 0.00 (0.00)           | 0.00 (0.00)           | <0.001 |
| Other Racial Group                           | 0.08 (0.27)           | 0.14 (0.34)           | -0.19 | 0.08 (0.27)           | 0.08 (0.27)           | 0.00   |
| White                                        | 0.74 (0.44)           | 0.61 (0.49)           | 0.28  | 0.74 (0.44)           | 0.73 (0.44)           | 0.02   |
| Hispanic or Latino                           | 0.25 (0.43)           | 0.44 (0.50)           | -0.43 | 0.25 (0.43)           | 0.24 (0.43)           | 0.01   |
| Not Hispanic or Latino                       | 0.75 (0.43)           | 0.56 (0.50)           | 0.43  | 0.75 (0.43)           | 0.76 (0.43)           | -0.01  |
| Admitted for Observation                     | 0.09 (0.29)           | 0.04 (0.19)           | 0.23  | 0.09 (0.29)           | 0.08 (0.27)           | 0.06   |
| Emergency                                    | 0.22 (0.42)           | 0.51 (0.50)           | -0.62 | 0.22 (0.42)           | 0.23 (0.42)           | -0.02  |
| Inpatient                                    | 0.68 (0.47)           | 0.44 (0.50)           | 0.50  | 0.68 (0.47)           | 0.69 (0.46)           | -0.02  |
| Urgent care encounter                        | 0.00 (0.05)           | 0.01 (0.11)           | -0.13 | 0.00 (0.05)           | 0.00 (0.04)           | 0.02   |
| Obese                                        | 0.41 (0.49)           | 0.37 (0.48)           | 0.07  | 0.41 (0.49)           | 0.41 (0.49)           | 0.00   |
| Cancer                                       | 0.05 (0.22)           | 0.05 (0.22)           | 0.01  | 0.05 (0.22)           | 0.06 (0.23)           | -0.03  |
| Cerebrovascular Disease                      | 0.14 (0.34)           | 0.07 (0.26)           | 0.21  | 0.14 (0.34)           | 0.14 (0.35)           | 0.01   |
| Chronic Kidney Disease (CKD)                 | 0.19 (0.39)           | 0.12 (0.33)           | 0.18  | 0.19 (0.39)           | 0.20 (0.40)           | -0.02  |
| Chronic Obstructive Pulmonary Disease (COPD) | 0.20 (0.40)           | 0.08 (0.26)           | 0.36  | 0.20 (0.40)           | 0.19 (0.39)           | 0.01   |
| Diabetes                                     | 0.39 (0.49)           | 0.30 (0.46)           | 0.17  | 0.39 (0.49)           | 0.39 (0.49)           | 0.00   |
| Heart Diseases                               | 0.32 (0.47)           | 0.19 (0.40)           | 0.30  | 0.32 (0.47)           | 0.32 (0.47)           | 0.00   |
| Hypertension                                 | 0.69 (0.46)           | 0.46 (0.50)           | 0.46  | 0.69 (0.46)           | 0.69 (0.46)           | 0.00   |
| Mood or Anxiety Disorder                     | 0.68 (0.47)           | 0.18 (0.39)           | 1.15  | 0.68 (0.47)           | 0.69 (0.46)           | -0.03  |

|                                                  |             |             |      |             |             |      |
|--------------------------------------------------|-------------|-------------|------|-------------|-------------|------|
| Other Psychiatric Disorder (Not Mood or Anxiety) | 0.50 (0.50) | 0.24 (0.43) | 0.55 | 0.50 (0.50) | 0.49 (0.50) | 0.01 |
|--------------------------------------------------|-------------|-------------|------|-------------|-------------|------|

**eTable 4.** Standardized Mean Differences (SMD) of Covariates Between Other (Not Fluoxetine or Fluvoxamine) SSRI-Treated and Control Groups Before and After Matching

|                                              | Before Matching       |                       |       | After Matching        |                       |       |
|----------------------------------------------|-----------------------|-----------------------|-------|-----------------------|-----------------------|-------|
|                                              | Means (SD)<br>Treated | Means (SD)<br>Control | SMD   | Means (SD)<br>Treated | Means (SD)<br>Control | SMD   |
| Age                                          | 64.69 (17.95)         | 51.61 (19.18)         | 0.70  | 64.69 (17.95)         | 64.73 (17.68)         | 0.00  |
| Female                                       | 0.60 (0.49)           | 0.50 (0.50)           | 0.20  | 0.60 (0.49)           | 0.59 (0.49)           | 0.01  |
| Male                                         | 0.40 (0.49)           | 0.50 (0.50)           | -0.20 | 0.40 (0.49)           | 0.41 (0.49)           | -0.01 |
| American Indian or Alaska Native             | 0.01 (0.12)           | 0.02 (0.14)           | -0.06 | 0.01 (0.12)           | 0.01 (0.10)           | 0.02  |
| Asian or Pacific Islander                    | 0.01 (0.11)           | 0.02 (0.16)           | -0.09 | 0.01 (0.11)           | 0.01 (0.11)           | 0.01  |
| Black or African American                    | 0.14 (0.34)           | 0.20 (0.40)           | -0.18 | 0.14 (0.34)           | 0.14 (0.35)           | 0.01  |
| Mixed Racial Group                           | 0.00 (0.05)           | 0.00 (0.06)           | 0.02  | 0.00 (0.05)           | 0.00 (0.05)           | 0.01  |
| Other Racial Group                           | 0.07 (0.25)           | 0.14 (0.34)           | -0.23 | 0.07 (0.25)           | 0.06 (0.24)           | 0.02  |
| White                                        | 0.77 (0.42)           | 0.61 (0.49)           | 0.35  | 0.77 (0.42)           | 0.77 (0.42)           | 0.01  |
| Hispanic or Latino                           | 0.29 (0.46)           | 0.44 (0.50)           | -0.32 | 0.29 (0.46)           | 0.28 (0.45)           | 0.03  |
| Not Hispanic or Latino                       | 0.71 (0.46)           | 0.56 (0.50)           | 0.32  | 0.71 (0.46)           | 0.72 (0.45)           | -0.03 |
| Admitted for Observation                     | 0.06 (0.24)           | 0.04 (0.19)           | 0.10  | 0.06 (0.24)           | 0.06 (0.23)           | 0.00  |
| Emergency                                    | 0.19 (0.39)           | 0.51 (0.50)           | -0.72 | 0.19 (0.39)           | 0.18 (0.38)           | 0.01  |
| Inpatient                                    | 0.75 (0.43)           | 0.44 (0.50)           | 0.66  | 0.75 (0.43)           | 0.76 (0.43)           | -0.02 |
| Urgent care encounter                        | 0.01 (0.08)           | 0.01 (0.11)           | 0.07  | 0.01 (0.08)           | 0.01 (0.08)           | 0.01  |
| Obese                                        | 0.39 (0.49)           | 0.37 (0.48)           | 0.03  | 0.39 (0.49)           | 0.39 (0.49)           | 0.00  |
| Cancer                                       | 0.08 (0.27)           | 0.05 (0.22)           | 0.11  | 0.08 (0.27)           | 0.08 (0.27)           | 0.01  |
| Cerebrovascular Disease                      | 0.16 (0.37)           | 0.07 (0.26)           | 0.28  | 0.16 (0.37)           | 0.15 (0.36)           | 0.03  |
| Chronic Kidney Disease (CKD)                 | 0.22 (0.41)           | 0.12 (0.33)           | 0.25  | 0.22 (0.41)           | 0.22 (0.41)           | 0.00  |
| Chronic Obstructive Pulmonary Disease (COPD) | 0.17 (0.38)           | 0.08 (0.26)           | 0.30  | 0.17 (0.38)           | 0.17 (0.37)           | 0.01  |
| Diabetes                                     | 0.43 (0.50)           | 0.30 (0.46)           | 0.27  | 0.43 (0.50)           | 0.43 (0.50)           | 0.00  |
| Heart Diseases                               | 0.37 (0.48)           | 0.19 (0.40)           | 0.40  | 0.37 (0.48)           | 0.37 (0.48)           | 0.01  |
| Hypertension                                 | 0.71 (0.45)           | 0.46 (0.50)           | 0.52  | 0.71 (0.45)           | 0.72 (0.45)           | -0.01 |
| Mood or Anxiety Disorder                     | 0.63 (0.48)           | 0.18 (0.39)           | 1.01  | 0.63 (0.48)           | 0.62 (0.49)           | 0.02  |

|                                                  |             |             |      |             |             |      |
|--------------------------------------------------|-------------|-------------|------|-------------|-------------|------|
| Other Psychiatric Disorder (Not Mood or Anxiety) | 0.49 (0.50) | 0.24 (0.43) | 0.53 | 0.49 (0.50) | 0.48 (0.50) | 0.02 |
|--------------------------------------------------|-------------|-------------|------|-------------|-------------|------|

**eTable 5.** Propensity Score (PS) Matching by Demographics, Encounter Type at the Time of the First Recorded COVID-19 Diagnosis, COVID-19 Comorbidities, and Prescription Indications for SSRI-Exposed Patients and Unexposed Control Patients

| Iteration | Exposed to SSRI, died, n (%), (n total = 3401) | Matched controls, died, n (%), (n total = 6802) | Difference in mortality rate (%) | RR [95% CI]      | p-value (adjusted) |
|-----------|------------------------------------------------|-------------------------------------------------|----------------------------------|------------------|--------------------|
| 1         | 497 (14.6)                                     | 1114 (16.4)                                     | -1.8                             | 0.91 [0.84–0.99] | 0.027              |
| 2         | 497 (14.6)                                     | 1110 (16.3)                                     | -1.7                             | 0.92 [0.85–0.99] | 0.029              |
| 3         | 497 (14.6)                                     | 1126 (16.6)                                     | -1.9                             | 0.91 [0.84–0.98] | 0.022              |
| 4         | 497 (14.6)                                     | 1123 (16.5)                                     | -1.9                             | 0.91 [0.84–0.98] | 0.022              |
| 5         | 497 (14.6)                                     | 1123 (16.5)                                     | -1.9                             | 0.91 [0.84–0.98] | 0.022              |
| 6         | 497 (14.6)                                     | 1124 (16.5)                                     | -1.9                             | 0.91 [0.84–0.98] | 0.022              |
| 7         | 497 (14.6)                                     | 1107 (16.3)                                     | -1.7                             | 0.92 [0.85–0.99] | 0.030              |
| 8         | 497 (14.6)                                     | 1130 (16.6)                                     | -2.0                             | 0.90 [0.83–0.98] | 0.022              |
| 9         | 497 (14.6)                                     | 1121 (16.5)                                     | -1.9                             | 0.91 [0.84–0.98] | 0.022              |
| 10        | 497 (14.6)                                     | 1125 (16.5)                                     | -1.9                             | 0.91 [0.84–0.98] | 0.022              |

**eTable 6.** Propensity Score (PS) Matching by Demographics, Encounter Type at the Time of the First Recorded COVID-19 Diagnosis, COVID-19 Comorbidities, and Prescription Indications for Fluoxetine-Exposed Patients and Unexposed Control Patients

| Iteration | Exposed to fluoxetine, Died, n (%), (n total = 470) | Matched controls, Died, n (%), (n total = 7050) | Difference in mortality rate (%) | RR [95% CI]      | p-value (adjusted) |
|-----------|-----------------------------------------------------|-------------------------------------------------|----------------------------------|------------------|--------------------|
| 1         | 46 (9.8)                                            | 940 (13.3)                                      | -3.5                             | 0.72 [0.53–0.97] | 0.029              |
| 2         | 46 (9.8)                                            | 940 (13.3)                                      | -3.5                             | 0.72 [0.53–0.97] | 0.029              |
| 3         | 46 (9.8)                                            | 941 (13.3)                                      | -3.6                             | 0.72 [0.53–0.97] | 0.029              |
| 4         | 46 (9.8)                                            | 941 (13.3)                                      | -3.6                             | 0.72 [0.53–0.97] | 0.029              |
| 5         | 46 (9.8)                                            | 937 (13.3)                                      | -3.5                             | 0.72 [0.54–0.97] | 0.029              |
| 6         | 46 (9.8)                                            | 942 (13.4)                                      | -3.6                             | 0.72 [0.53–0.97] | 0.029              |
| 7         | 46 (9.8)                                            | 942 (13.4)                                      | -3.6                             | 0.72 [0.53–0.97] | 0.029              |
| 8         | 46 (9.8)                                            | 942 (13.4)                                      | -3.6                             | 0.72 [0.53–0.97] | 0.029              |
| 9         | 46 (9.8)                                            | 937 (13.3)                                      | -3.5                             | 0.72 [0.54–0.97] | 0.029              |
| 10        | 46 (9.8)                                            | 939 (13.3)                                      | -3.5                             | 0.72 [0.54–0.97] | 0.029              |

**eTable 7.** Propensity Score (PS) Matching by Demographics, Encounter Type at the Time of the First Recorded COVID-19 Diagnosis, COVID-19 Comorbidities, and Prescription Indications for Fluoxetine- or Fluvoxamine-Exposed Patients and Unexposed Control Patients

| Iteration | Exposed to fluoxetine or fluvoxamine, died, n (%), (n total = 481) | Matched controls, died, n (%), (n total = 7215) | Difference in mortality rate (%) | RR [95% CI]      | p-value (adjusted) |
|-----------|--------------------------------------------------------------------|-------------------------------------------------|----------------------------------|------------------|--------------------|
| 1         | 48 (10.0)                                                          | 960 (13.3)                                      | -3.3                             | 0.74 [0.55–0.98] | 0.042              |
| 2         | 48 (10.0)                                                          | 958 (13.3)                                      | -3.3                             | 0.74 [0.55–0.99] | 0.042              |
| 3         | 48 (10.0)                                                          | 959 (13.3)                                      | -3.3                             | 0.74 [0.55–0.99] | 0.042              |
| 4         | 48 (10.0)                                                          | 962 (13.3)                                      | -3.4                             | 0.73 [0.55–0.98] | 0.042              |
| 5         | 48 (10.0)                                                          | 961 (13.3)                                      | -3.3                             | 0.74 [0.55–0.98] | 0.042              |
| 6         | 48 (10.0)                                                          | 959 (13.3)                                      | -3.3                             | 0.74 [0.55–0.99] | 0.042              |
| 7         | 48 (10.0)                                                          | 956 (13.3)                                      | -3.3                             | 0.74 [0.55–0.99] | 0.042              |
| 8         | 48 (10.0)                                                          | 959 (13.3)                                      | -3.3                             | 0.74 [0.55–0.99] | 0.042              |
| 9         | 48 (10.0)                                                          | 964 (13.4)                                      | -3.4                             | 0.73 [0.55–0.98] | 0.042              |
| 10        | 48 (10.0)                                                          | 956 (13.3)                                      | -3.3                             | 0.74 [0.55–0.99] | 0.042              |

**eTable 8.** Propensity Score (PS) Matching by Demographics, Encounter Type at the Time of the First Recorded COVID-19 Diagnosis, COVID-19 Comorbidities, and Prescription Indications for Other (Not Fluoxetine or Fluvoxamine) SSRI-Exposed Patients and Unexposed Control Patients

| Iteration | Exposed to other SSRI, died, n (%), (n total = 2898) | Matched controls, died, n (%), (n total = 8694) | Difference in mortality rate (%) | RR [95% CI]      | p-value (adjusted) |
|-----------|------------------------------------------------------|-------------------------------------------------|----------------------------------|------------------|--------------------|
| 1         | 447 (15.4)                                           | 1479 (17.0)                                     | -1.6                             | 0.92 [0.84–1.00] | 0.052              |
| 2         | 447 (15.4)                                           | 1489 (17.1)                                     | -1.7                             | 0.91 [0.83–0.99] | 0.048              |
| 3         | 447 (15.4)                                           | 1482 (17.0)                                     | -1.6                             | 0.91 [0.84–1.00] | 0.052              |
| 4         | 447 (15.4)                                           | 1501 (17.3)                                     | -1.8                             | 0.90 [0.83–0.99] | 0.048              |
| 5         | 447 (15.4)                                           | 1496 (17.2)                                     | -1.8                             | 0.91 [0.83–0.99] | 0.048              |
| 6         | 447 (15.4)                                           | 1491 (17.1)                                     | -1.7                             | 0.91 [0.83–0.99] | 0.048              |
| 7         | 447 (15.4)                                           | 1496 (17.2)                                     | -1.8                             | 0.91 [0.83–0.99] | 0.048              |
| 8         | 447 (15.4)                                           | 1474 (17.0)                                     | -1.5                             | 0.92 [0.84–1.00] | 0.057              |
| 9         | 447 (15.4)                                           | 1494 (17.2)                                     | -1.8                             | 0.91 [0.83–0.99] | 0.048              |
| 10        | 447 (15.4)                                           | 1493 (17.2)                                     | -1.7                             | 0.91 [0.83–0.99] | 0.048              |
